# Supplementary material for: Antiplasmodial dihetarylthioethers target the coenzyme A synthesis pathway in Plasmodium falciparum erythrocytic stages
Source: PubMed Central journal article supplement (PMC5430599; doi:10.1186/s12936-017-1839-3), 2017-05-15
Supplement: 12936_2017_1839_MOESM1_ESM.pdf [file 12936_2017_1839_MOESM1_ESM.pdf]

**Additional file 1:** X-ray crystallographic structure of **3p**

**Experimental:** An irregular pale yellow prism ca.  $0.4 \times 0.2 \times 0.2$  mm was mounted on a glass fibre in inert oil and transferred to the cold gas stream of the diffractometer (Oxford Diffraction Xcalibur E). Data were recorded at 100 K using monochromated Mo  $K\alpha$  radiation. Absorption corrections were based on multi-scans. The structure was refined anisotropically on  $F^2$  using the program SHELXL-97 (G. M. Sheldrick, University of Göttingen, Germany). Methyls were refined as idealized rigid groups allowed to rotate but not tip; other hydrogens were included using a riding model starting from calculated positions.

Complete crystallographic data have been deposited with the Cambridge Crystallographic Data Centre as supplementary publication no. CCDC-1526841. Copies of the data can be obtained free of charge from [www.ccdc.cam.ac.uk/data\\_request/cif](http://www.ccdc.cam.ac.uk/data_request/cif).

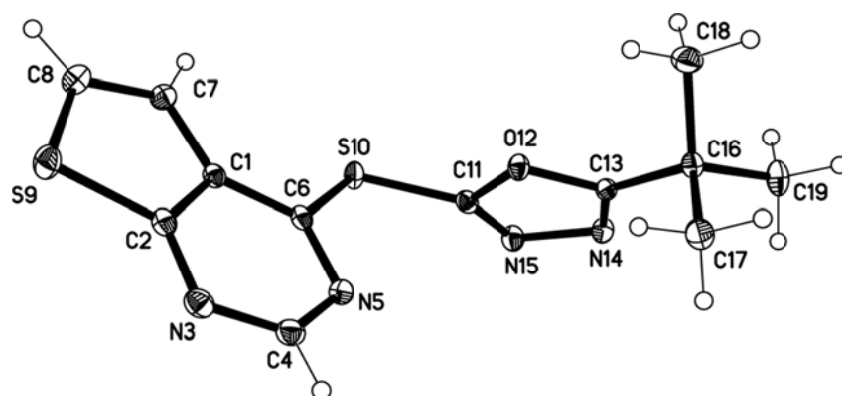

**Additional file 1:** Figure 1: X-ray crystallographic structure of **3p**.

**Additional file 1:** Table 1: Crystal data and structure refinement of **3p**.

|                        |                                                                                                                                   |
|------------------------|-----------------------------------------------------------------------------------------------------------------------------------|
| Empirical formula      | $C_{12}H_{12}N_4OS_2$                                                                                                             |
| Formula weight         | 292.38                                                                                                                            |
| Temperature            | 100(2) K                                                                                                                          |
| Wavelength             | 0.71073 Å                                                                                                                         |
| Crystal system         | monoclinic                                                                                                                        |
| Space group            | $C2/c$                                                                                                                            |
| Unit cell dimensions   | $a = 16.8835(8)$ Å $\alpha = 90^\circ$<br>$b = 11.3347(4)$ Å $\beta = 106.216(5)^\circ$<br>$c = 14.2477(7)$ Å $\gamma = 90^\circ$ |
| Volume                 | $2618.1(2)$ Å <sup>3</sup>                                                                                                        |
| Z                      | 8                                                                                                                                 |
| Density (calculated)   | 1.484 Mg/m <sup>3</sup>                                                                                                           |
| Absorption coefficient | 0.403 mm <sup>-1</sup>                                                                                                            |
| F(000)                 | 1216                                                                                                                              |
| Crystal size           | 0.4 x 0.2 x 0.2 mm <sup>3</sup>                                                                                                   |

|                                   |                                             |
|-----------------------------------|---------------------------------------------|
| Theta range for data collection   | 2.19 to 31.10°                              |
| Index ranges                      | -24<=h<=22, -16<=k<=16, -20<=l<=20          |
| Reflections collected             | 34143                                       |
| Independent reflections           | 3969 [R(int) = 0.0487]                      |
| Completeness to Theta = 30.00°    | 98.0%                                       |
| Absorption correction             | Semi-empirical from equivalents             |
| Max. and min. transmission        | 1.00000 and 0.94434                         |
| Refinement method                 | Full-matrix least-squares on F <sup>2</sup> |
| Data / restraints / parameters    | 3969 / 0 / 175                              |
| Goodness-of-fit on F <sup>2</sup> | 1.069                                       |
| Final R indices [I>2sigma(I)]     | R1 = 0.0332, wR2 = 0.0748                   |
| R Indices (all data)              | R1 = 0.0431, wR2 = 0.0805                   |
| Largest diff. peak and hole       | 0.476 and -0.319 e.Å <sup>-3</sup>          |

**Additional file 1:** Table 2: Atomic coordinates ( $\times 10^4$ ) and equivalent isotropic displacement parameters ( $\text{Å}^2 \times 10^3$ ). U(eq) is defined as one third of the trace of the orthogonalized  $U_{ij}$  tensor.<sup>a</sup>

|       | x         | y           | z          | U(eq)   |
|-------|-----------|-------------|------------|---------|
| C(1)  | 5813.6(7) | -356.0(10)  | 4360.8(9)  | 11.1(2) |
| C(2)  | 5114.5(8) | -979.9(11)  | 3811.9(9)  | 12.3(2) |
| N(3)  | 4417.4(7) | -476.4(10)  | 3272.2(8)  | 15.1(2) |
| C(4)  | 4436.9(8) | 696.2(11)   | 3278.5(9)  | 14.8(2) |
| N(5)  | 5050.6(7) | 1404.8(9)   | 3779.5(8)  | 13.6(2) |
| C(6)  | 5724.3(7) | 870.8(10)   | 4320.4(9)  | 11.1(2) |
| C(7)  | 6476.6(8) | -1120.7(11) | 4840.8(9)  | 13.7(2) |
| C(8)  | 6269.9(8) | -2269.2(11) | 4651.9(10) | 16.9(3) |
| S(9)  | 5279.5(2) | -2484.5(3)  | 3905.2(2)  | 17.3(1) |
| S(10) | 6530.3(2) | 1732.9(3)   | 5069.0(2)  | 13.5(1) |
| C(11) | 6414.7(7) | 3049.2(11)  | 4419.9(9)  | 11.6(2) |
| O(12) | 6475.5(5) | 3073.3(7)   | 3484.3(6)  | 11.9(2) |
| C(13) | 6511.2(7) | 4257.7(10)  | 3315.2(9)  | 10.6(2) |
| N(14) | 6484.8(7) | 4881.7(9)   | 4065.4(8)  | 13.4(2) |
| N(15) | 6412.1(7) | 4079.5(9)   | 4794.5(8)  | 14.1(2) |
| C(16) | 6552.6(7) | 4666.6(10)  | 2331.2(9)  | 11.6(2) |
| C(17) | 5705.1(8) | 4466.0(12)  | 1595.2(9)  | 16.3(2) |
| C(18) | 7215.3(8) | 3966.6(12)  | 2019.5(10) | 18.5(3) |
| C(19) | 6774.9(9) | 5979.0(11)  | 2401.1(10) | 17.9(3) |

<sup>a</sup> Values in brackets correspond to the standard deviation with regard to the last decimal digit.

**Additional file 1:** Table 3: Bond lengths [ $\text{Å}$ ]<sup>a</sup>

|           |            |             |            |
|-----------|------------|-------------|------------|
| C(1)-C(6) | 1.3981(16) | S(10)-C(11) | 1.7375(12) |
| C(1)-C(2) | 1.4103(17) | C(11)-N(15) | 1.2846(16) |
| C(1)-C(7) | 1.4300(17) | C(11)-O(12) | 1.3656(14) |
| C(2)-N(3) | 1.3405(16) | O(12)-C(13) | 1.3682(14) |

|            |            |             |            |
|------------|------------|-------------|------------|
| C(2)-S(9)  | 1.7272(13) | C(13)-N(14) | 1.2928(16) |
| N(3)-C(4)  | 1.3295(17) | C(13)-C(16) | 1.4967(17) |
| C(4)-N(5)  | 1.3472(16) | N(14)-N(15) | 1.4115(14) |
| N(5)-C(6)  | 1.3284(16) | C(16)-C(19) | 1.5306(17) |
| C(6)-S(10) | 1.7702(12) | C(16)-C(18) | 1.5349(18) |
| C(7)-C(8)  | 1.3552(18) | C(16)-C(17) | 1.5365(17) |
| C(8)-S(9)  | 1.7303(14) |             |            |

<sup>a</sup> Values in brackets correspond to the standard deviation with regard to the last decimal digit.

**Additional file 1: Table 4: Bond angles [°]<sup>a</sup>**

|                  |            |                   |            |
|------------------|------------|-------------------|------------|
| C(6)-C(1)-C(2)   | 114.33(11) | N(15)-C(11)-O(12) | 113.41(10) |
| C(6)-C(1)-C(7)   | 133.12(11) | N(15)-C(11)-S(10) | 124.92(10) |
| C(2)-C(1)-C(7)   | 112.55(11) | O(12)-C(11)-S(10) | 120.59(9)  |
| N(3)-C(2)-C(1)   | 124.71(11) | C(11)-O(12)-C(13) | 102.16(9)  |
| N(3)-C(2)-S(9)   | 124.15(9)  | N(14)-C(13)-O(12) | 112.20(10) |
| C(1)-C(2)-S(9)   | 111.13(9)  | N(14)-C(13)-C(16) | 128.79(11) |
| C(4)-N(3)-C(2)   | 113.93(11) | O(12)-C(13)-C(16) | 118.99(10) |
| N(3)-C(4)-N(5)   | 127.84(12) | C(13)-N(14)-N(15) | 106.63(10) |
| C(6)-N(5)-C(4)   | 116.30(11) | C(11)-N(15)-N(14) | 105.59(10) |
| N(5)-C(6)-C(1)   | 122.83(11) | C(13)-C(16)-C(19) | 108.35(10) |
| N(5)-C(6)-S(10)  | 119.19(9)  | C(13)-C(16)-C(18) | 109.85(10) |
| C(1)-C(6)-S(10)  | 117.92(9)  | C(19)-C(16)-C(18) | 109.63(10) |
| C(8)-C(7)-C(1)   | 111.32(11) | C(13)-C(16)-C(17) | 108.37(10) |
| C(7)-C(8)-S(9)   | 114.12(10) | C(19)-C(16)-C(17) | 110.67(10) |
| C(2)-S(9)-C(8)   | 90.88(6)   | C(18)-C(16)-C(17) | 109.95(10) |
| C(11)-S(10)-C(6) | 101.54(6)  | N(15)-C(11)-O(12) | 113.41(10) |

<sup>a</sup> Values in brackets correspond to the standard deviation with regard to the last decimal digit.

**Additional file 1: Table 5: Torsion angles [°]<sup>a</sup>**

|                      |             |                         |             |
|----------------------|-------------|-------------------------|-------------|
| C(6)-C(1)-C(2)-N(3)  | 1.24(18)    | N(5)-C(6)-S(10)-C(11)   | -28.96(11)  |
| C(7)-C(1)-C(2)-N(3)  | -178.20(11) | C(1)-C(6)-S(10)-C(11)   | 153.85(9)   |
| C(6)-C(1)-C(2)-S(9)  | -179.94(9)  | C(6)-S(10)-C(11)-N(15)  | 132.85(11)  |
| C(7)-C(1)-C(2)-S(9)  | 0.63(13)    | C(6)-S(10)-C(11)-O(12)  | -59.80(10)  |
| C(1)-C(2)-N(3)-C(4)  | 1.06(18)    | N(15)-C(11)-O(12)-C(13) | 0.00(13)    |
| S(9)-C(2)-N(3)-C(4)  | -177.62(10) | S(10)-C(11)-O(12)-C(13) | -168.71(9)  |
| C(2)-N(3)-C(4)-N(5)  | -2.46(19)   | C(11)-O(12)-C(13)-N(14) | 0.67(13)    |
| N(3)-C(4)-N(5)-C(6)  | 1.26(19)    | C(11)-O(12)-C(13)-C(16) | -177.89(10) |
| C(4)-N(5)-C(6)-C(1)  | 1.49(17)    | O(12)-C(13)-N(14)-N(15) | -1.04(13)   |
| C(4)-N(5)-C(6)-S(10) | -175.56(9)  | C(16)-C(13)-N(14)-N(15) | 177.35(11)  |
| C(2)-C(1)-C(6)-N(5)  | -2.57(17)   | O(12)-C(11)-N(15)-N(14) | -0.59(14)   |
| C(7)-C(1)-C(6)-N(5)  | 176.71(12)  | S(10)-C(11)-N(15)-N(14) | 167.55(9)   |
| C(2)-C(1)-C(6)-S(10) | 174.51(8)   | C(13)-N(14)-N(15)-C(11) | 0.98(13)    |
| C(7)-C(1)-C(6)-S(10) | -6.21(19)   | N(14)-C(13)-C(16)-C(19) | 13.87(17)   |

|                     |             |                         |             |
|---------------------|-------------|-------------------------|-------------|
| C(6)-C(1)-C(7)-C(8) | -179.43(13) | O(12)-C(13)-C(16)-C(19) | -167.85(10) |
| C(2)-C(1)-C(7)-C(8) | -0.14(15)   | N(14)-C(13)-C(16)-C(18) | 133.59(13)  |
| C(1)-C(7)-C(8)-S(9) | -0.42(14)   | O(12)-C(13)-C(16)-C(18) | -48.12(14)  |
| N(3)-C(2)-S(9)-C(8) | 178.11(11)  | N(14)-C(13)-C(16)-C(17) | -106.26(14) |
| C(1)-C(2)-S(9)-C(8) | -0.72(10)   | O(12)-C(13)-C(16)-C(17) | 72.02(13)   |
| C(7)-C(8)-S(9)-C(2) | 0.67(11)    |                         |             |

---

<sup>a</sup> Values in brackets correspond to the standard deviation with regard to the last decimal digit.
