# Supplementary material for: Antiplasmodial dihetarylthioethers target the coenzyme A synthesis pathway in Plasmodium falciparum erythrocytic stages
Source: PubMed Central journal article supplement (PMC5430599; doi:10.1186/s12936-017-1839-3), 2017-05-15

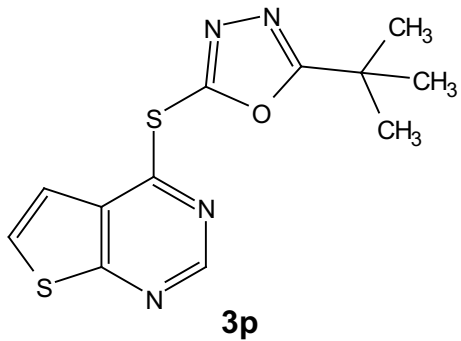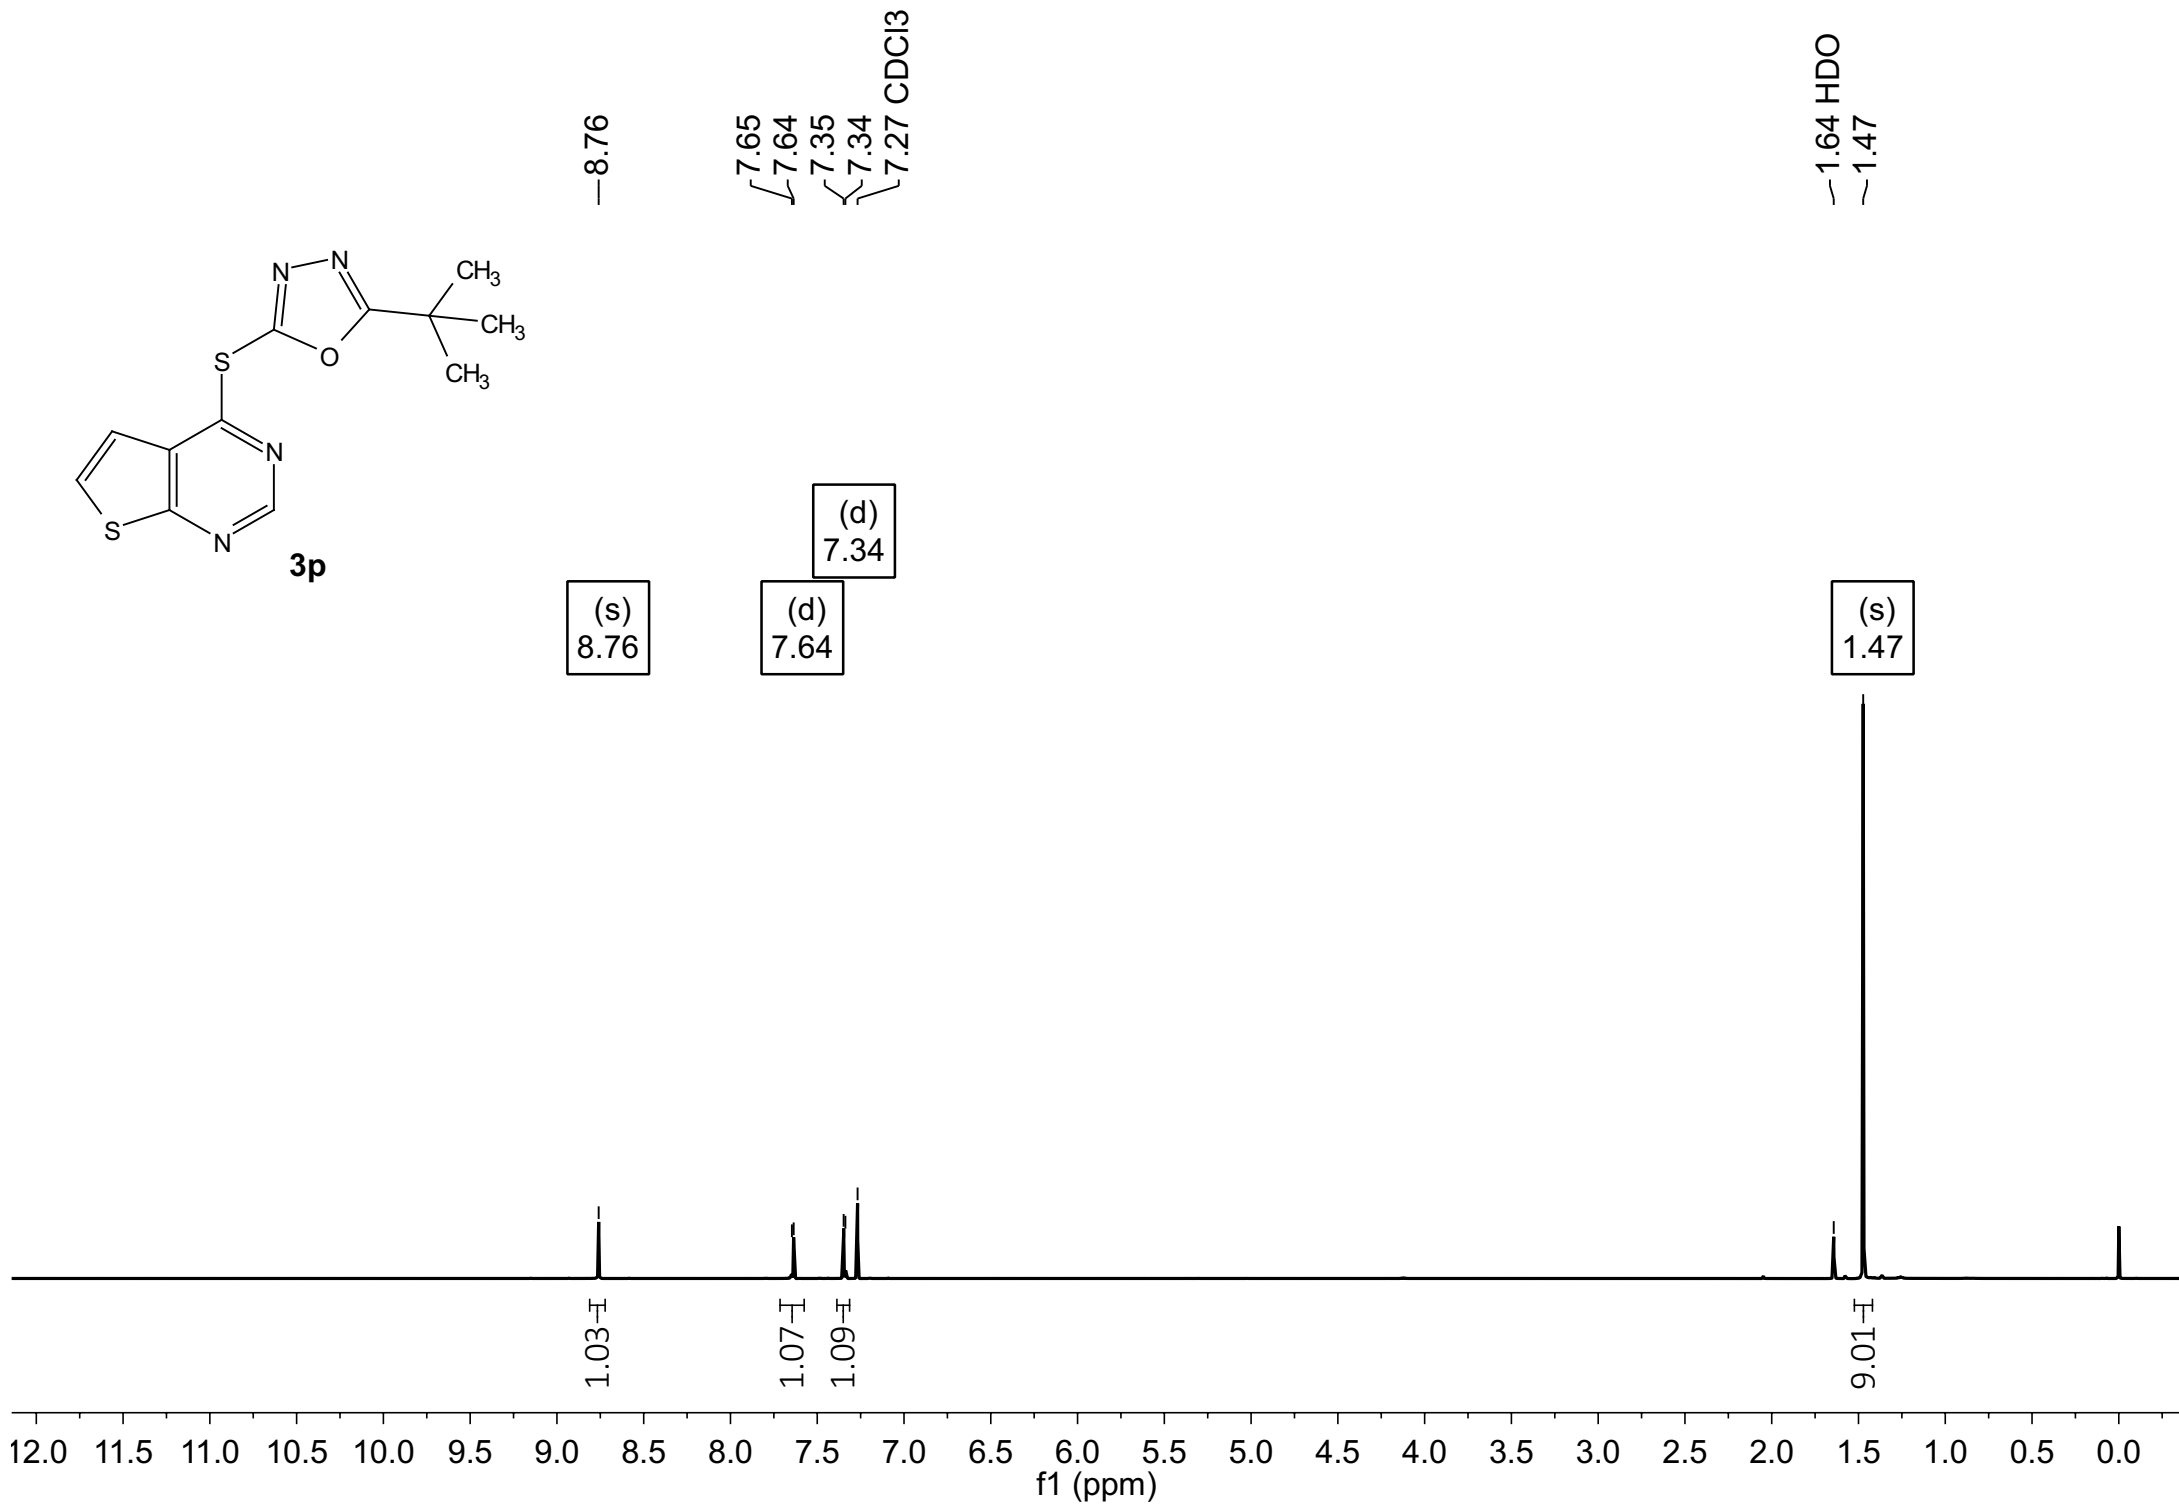

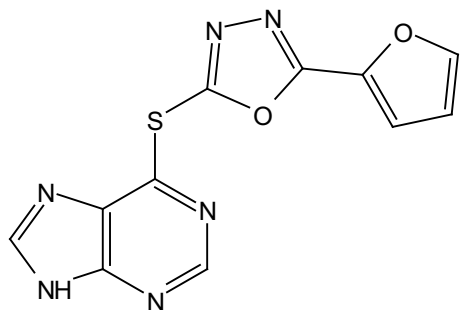

**6b**

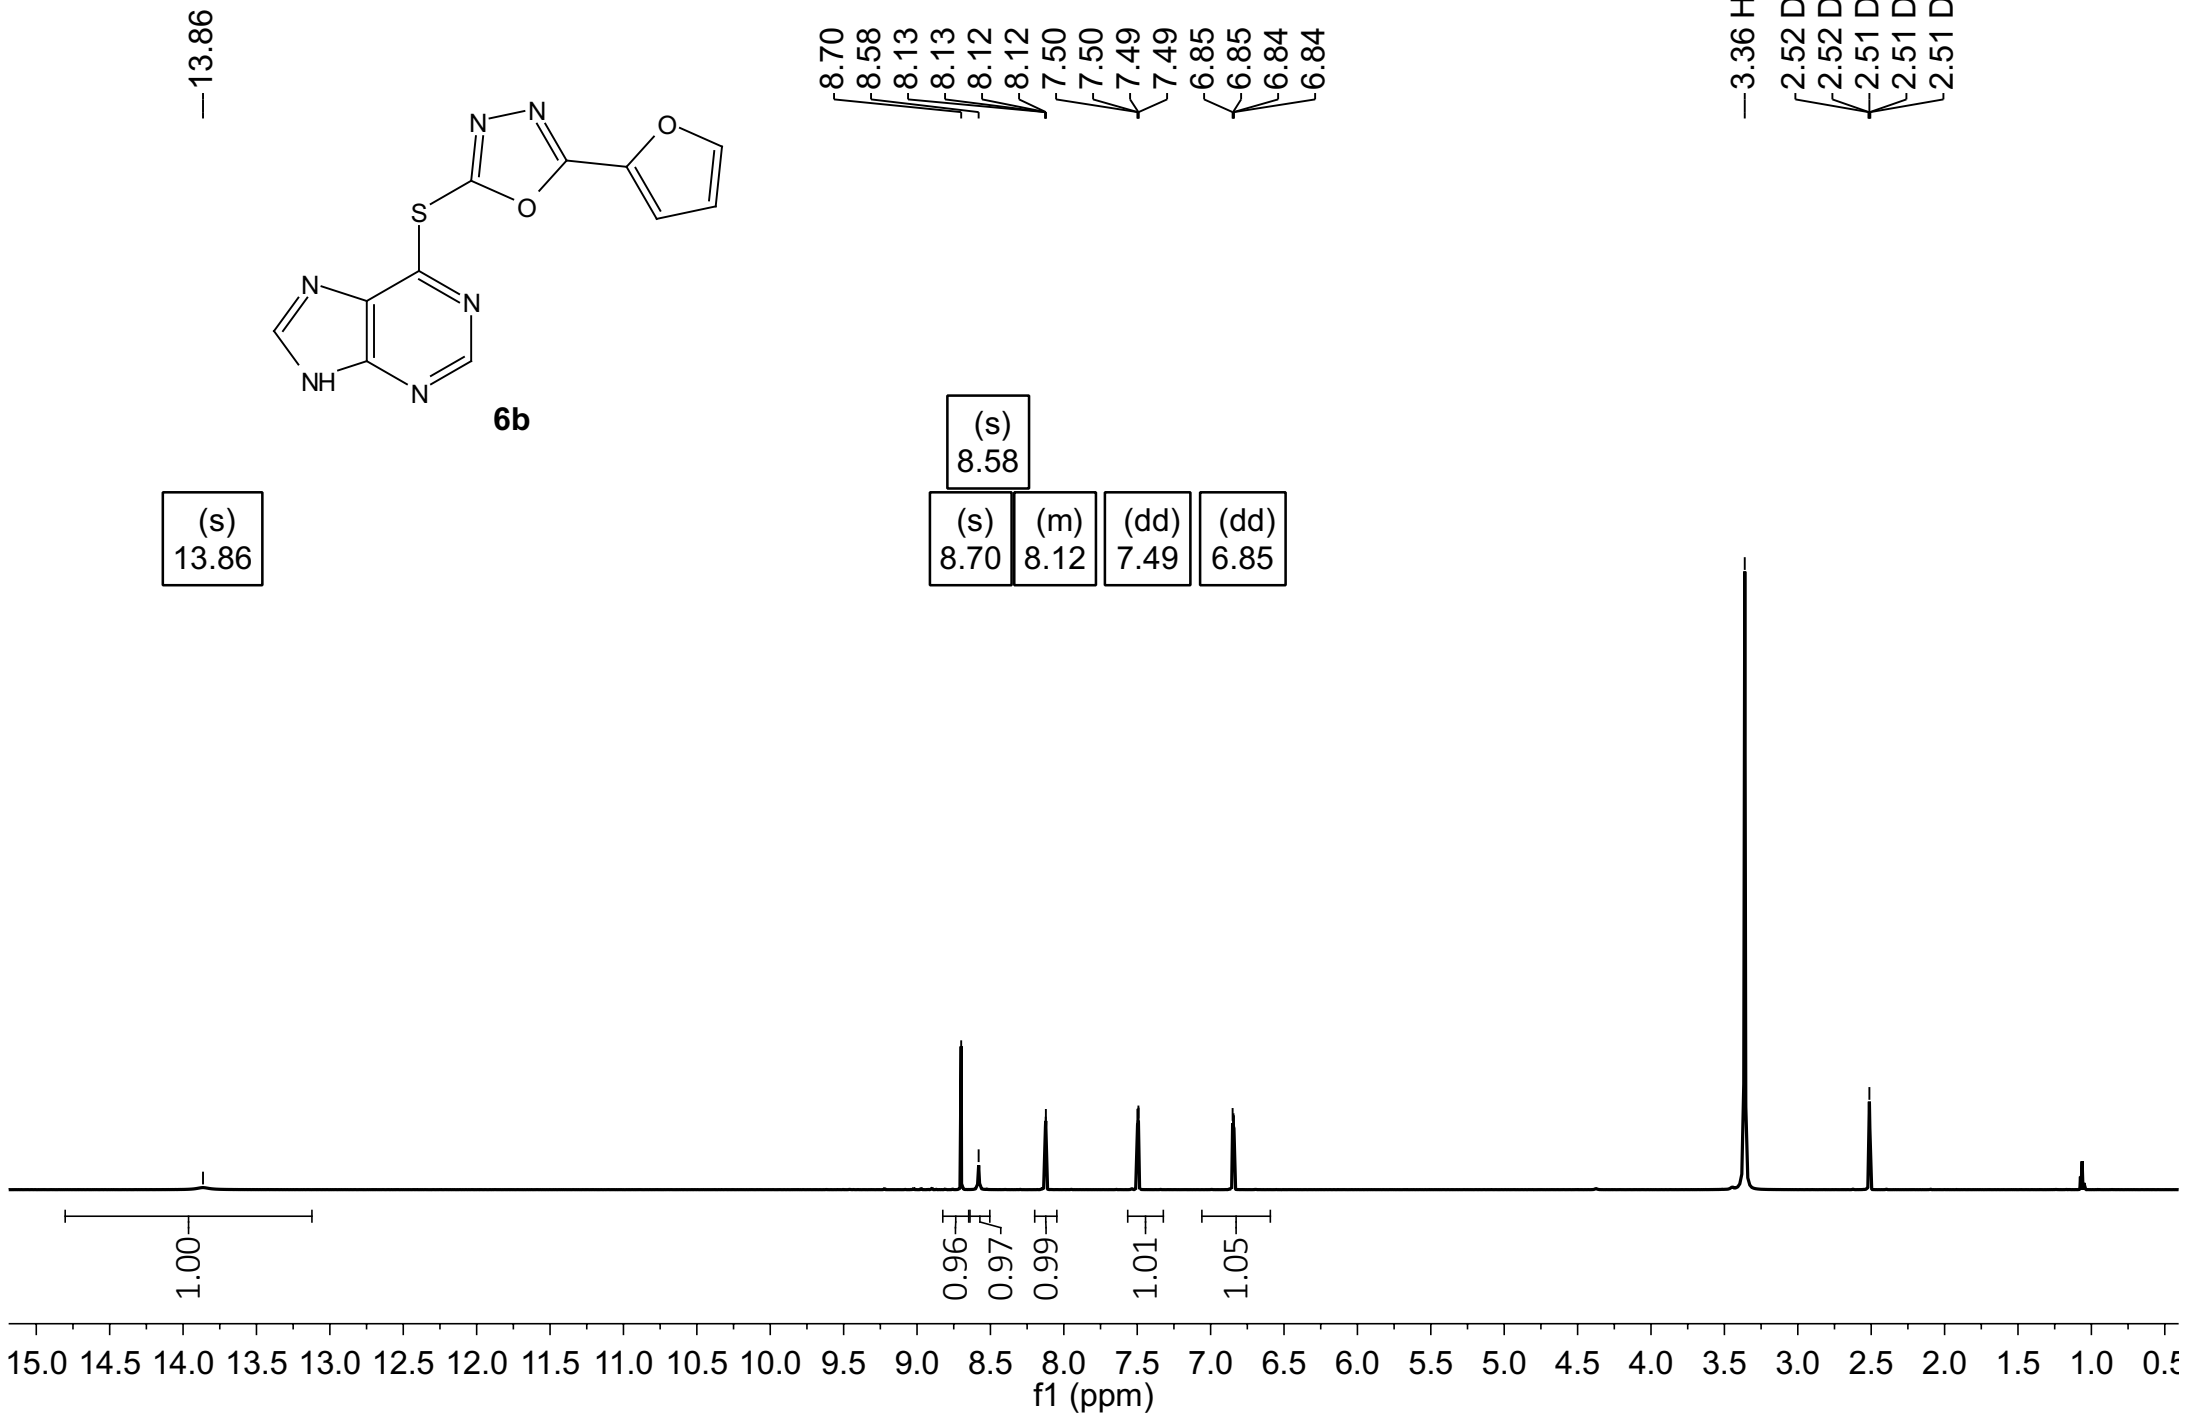

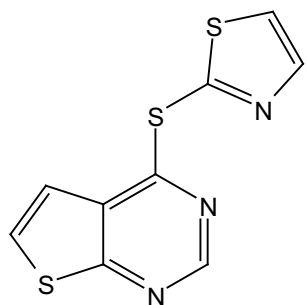

**8d**

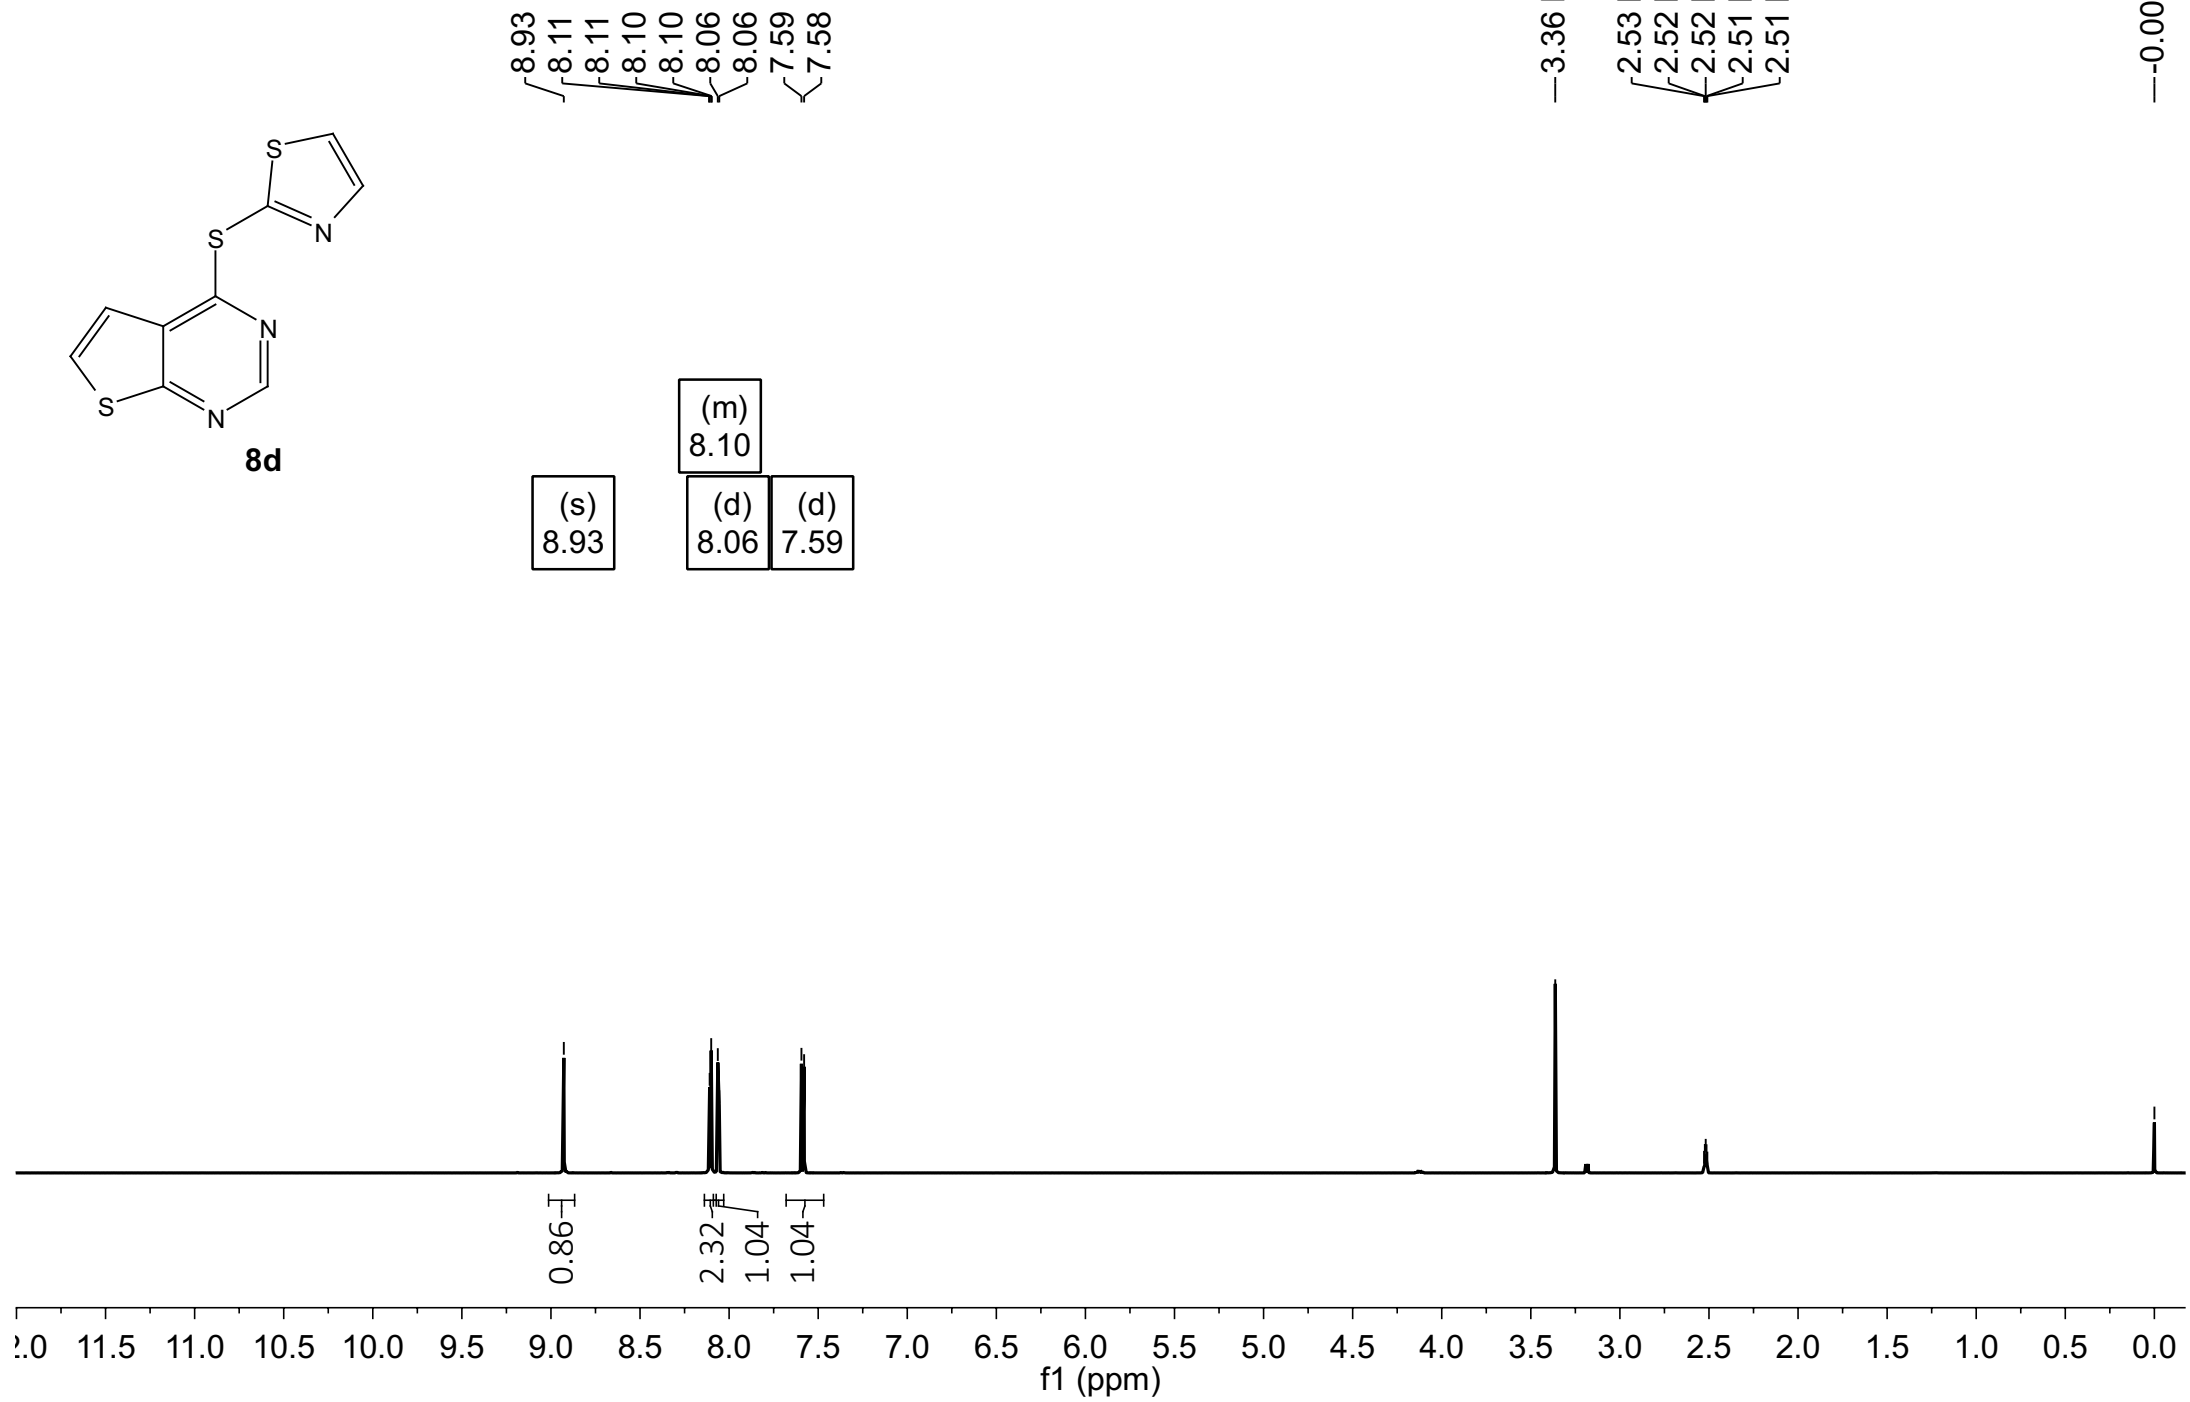

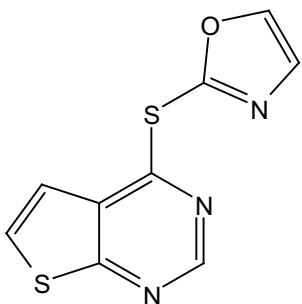

8e

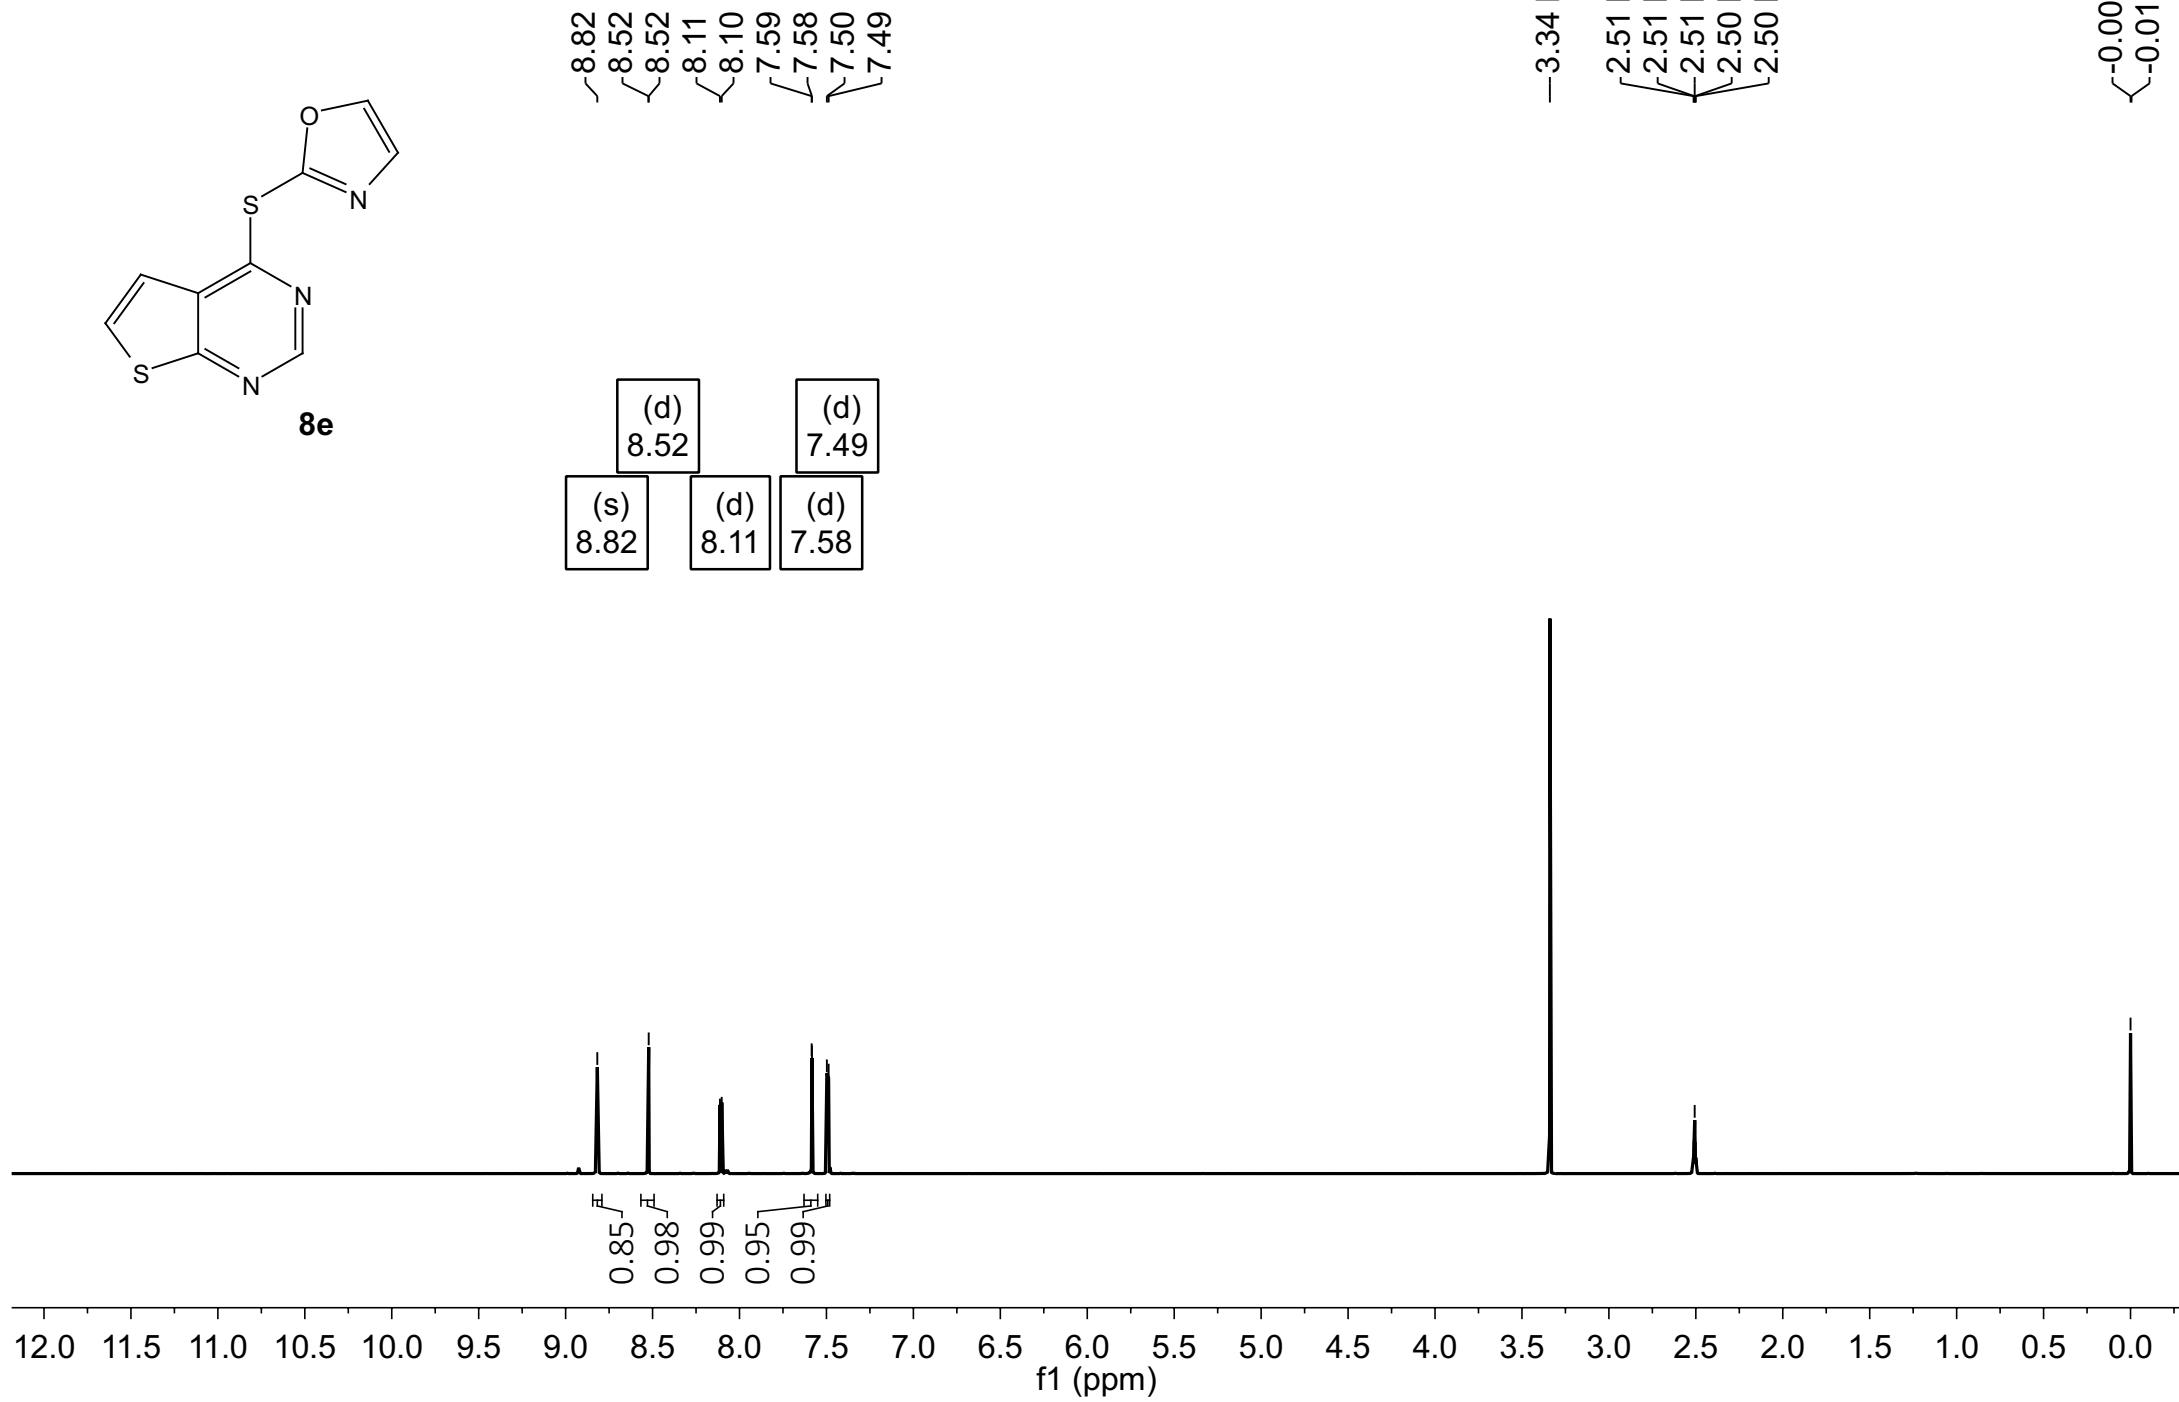

Supplement: 12936_2017_1839_MOESM3_ESM.pdf [file 12936_2017_1839_MOESM3_ESM.pdf]
