# Supplementary material for: Antiplasmodial dihetarylthioethers target the coenzyme A synthesis pathway in Plasmodium falciparum erythrocytic stages
Source: PubMed Central journal article supplement (PMC5430599; doi:10.1186/s12936-017-1839-3), 2017-05-15
Supplement: 12936_2017_1839_MOESM4_ESM.pdf [file 12936_2017_1839_MOESM4_ESM.pdf]

Additional File 4

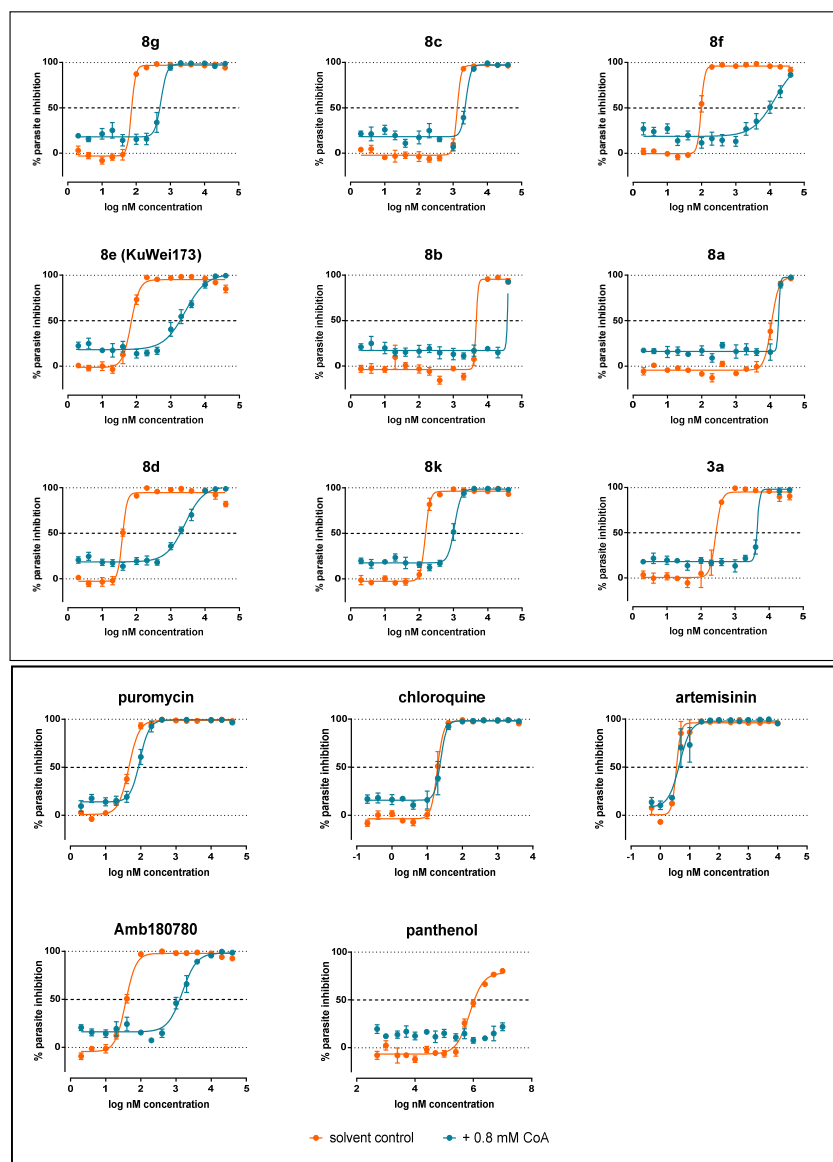

**Figure Af4-1:** Dose-response plots for test compounds (top) and reference drugs (bottom) showing parasite viability (3D7) in absence and presence of coenzyme A.

**Table Af4-1:** Assay performance: all  $Z' \gg 0.5$  [1]

|           | Z' point 1 | Z' point 2 | mean Z' | SEM Z' |
|-----------|------------|------------|---------|--------|
| solvent A | 0.75       | 0.82       | 0.78    | 0.03   |
| solvent B | 0.84       | 0.74       | 0.79    | 0.05   |
| rescue A  | 0.76       | 0.78       | 0.77    | 0.01   |
| rescue B  | 0.77       | 0.78       | 0.77    | 0.00   |

1. Zhang JH, Chung TD, Oldenburg KR: **A Simple Statistical Parameter for Use in Evaluation and Validation of High Throughput Screening Assays.** *Journal of biomolecular screening* 1999, **4**:67-73.
